# Supplementary material for: A high-sugar diet rapidly enhances susceptibility to colitis via depletion of luminal short-chain fatty acids in mice
Source: PubMed Central journal article supplement (PMC6707253; doi:10.1038/s41598-019-48749-2), 2019-08-23

## A high-sugar diet rapidly enhances susceptibility to colitis via depletion of luminal short-chain fatty acids in mice

Michael Laffin MD<sup>1,3\*</sup>, Robert Fedorak, BSc<sup>2,3\*</sup>, Aiden Zalasky, BSc<sup>2,3</sup>, Heekuk Park PhD<sup>2,3</sup>, Amanpreet Gill<sup>2,3</sup>, Ambika Agrawal<sup>2,3</sup>, Ammar Keshteli<sup>2,3</sup>, Naomi Hotte<sup>2,3</sup>, Karen L. Madsen<sup>2,3+</sup>

<sup>1</sup>Department of Surgery, University of Alberta; <sup>2</sup>Department of Medicine, University of Alberta, Edmonton, Alberta Canada T6G 2E1; <sup>3</sup>The Centre of Excellence for Gastrointestinal Inflammation and Immunity Research (CEGIIR), University of Alberta, Edmonton, Alberta, Canada T6G 2E1

### Supplementary Information

**Supplemental Table 1.** Relative abundances of fecal microbes in chow and high-sugar fed mice after two days of diet

**Supplemental Figure 1.** Relative abundances of bacteria at the phyla and family levels in stool samples from individual mice at day -3 (prior to start of diet) and at day 0 (after 2 days on diet ± acetate and prior to DSS). Cecum samples were analyzed in individual mice on Day 0 (2 days on diet ± acetate and prior to DSS). HS: high sugar. CH: chow. NaAc: Sodium acetate. Cec: Cecum.

**Supplemental Table 1. Relative abundances of fecal microbes in chow and high-sugar fed mice after two days of diet**

|                     | Chow diet | SD       | High-sugar diet | SD       | p-values        | FDR             |
|---------------------|-----------|----------|-----------------|----------|-----------------|-----------------|
| <b>Phyla</b>        |           |          |                 |          |                 |                 |
| Verrucomicrobia     | 4.824576  | 6.52518  | 42.85236        | 13.3653  | <b>0.000857</b> | <b>0.006</b>    |
| Tenericutes         | 1.002815  | 0.710155 | 0.025408        | 0.021829 | <b>0.011857</b> | <b>0.0415</b>   |
| Firmicutes          | 39.83634  | 22.58539 | 9.40704         | 3.90678  | <b>0.019571</b> | <b>0.045667</b> |
| Proteobacteria      | 6.764601  | 7.387729 | 2.850808        | 1.872713 | 0.362           | 0.6335          |
| Bacteroidetes       | 47.18191  | 18.20676 | 44.52112        | 13.15364 | 0.778857        | 0.908667        |
| Actinobacteria      | 0.050156  | 0.035119 | 0.048471        | 0.032134 | 0.926143        | 0.926143        |
| <b>Class</b>        |           |          |                 |          |                 |                 |
| Verrucomicrobiae    | 4.824576  | 6.52518  | 42.85236        | 13.3653  | <b>0.00075</b>  | <b>0.009</b>    |
| Mollicutes          | 1.002815  | 0.710155 | 0.025408        | 0.021829 | <b>0.012</b>    | 0.072           |
| Clostridia          | 39.30348  | 22.5447  | 9.278293        | 3.872021 | <b>0.021417</b> | 0.085667        |
| Erysipelotrichi     | 0.002467  | 0.003022 | 0.018016        | 0.014712 | 0.052167        | 0.1565          |
| Bacilli             | 0.530391  | 0.472922 | 0.11073         | 0.071567 | 0.107583        | 0.2582          |
| Gammaproteobacteria | 0.051919  | 0.056161 | 0.214467        | 0.20332  | 0.162083        | 0.324167        |
| Actinobacteria      | 0.001253  | 0.002505 | 0.020935        | 0.030072 | 0.252083        | 0.432143        |
| Alphaproteobacteria | 6.091873  | 7.204506 | 1.810717        | 1.557043 | 0.294917        | 0.442375        |
| Coriobacteriia      | 0.048903  | 0.032907 | 0.027537        | 0.017513 | 0.29975         | 0.399667        |
| Betaproteobacteria  | 0.620809  | 0.209882 | 0.825625        | 0.350862 | 0.370583        | 0.4447          |
| Bacteroidia         | 47.18191  | 18.20676 | 44.52112        | 13.15364 | 0.79625         | 0.79625         |
| <b>Order</b>        |           |          |                 |          |                 |                 |
| Verrucomicrobiales  | 4.824576  | 6.52518  | 42.85236        | 13.3653  | <b>0.0005</b>   | <b>0.0075</b>   |
| Anaeroplasmatales   | 1.002815  | 0.710155 | 0.025408        | 0.021829 | <b>0.010167</b> | 0.07625         |
| Clostridiales       | 39.30348  | 22.5447  | 9.278293        | 3.872021 | <b>0.02275</b>  | 0.11375         |
| Erysipelotrichales  | 0.002467  | 0.003022 | 0.018016        | 0.014712 | 0.054667        | 0.205           |
| Lactobacillales     | 0.529215  | 0.47353  | 0.11073         | 0.071567 | 0.108417        | 0.32525         |
| Enterobacteriales   | 0.050666  | 0.057088 | 0.214467        | 0.20332  | 0.159833        | 0.399583        |
| Bifidobacteriales   | 0.001253  | 0.002505 | 0.020935        | 0.030072 | 0.248           | 0.531429        |
| RF32                | 6.091873  | 7.204506 | 1.810717        | 1.557043 | 0.293333        | 0.55            |
| Coriobacteriales    | 0.048903  | 0.032907 | 0.027537        | 0.017513 | 0.297417        | 0.495694        |
| Burkholderiales     | 0.620809  | 0.209882 | 0.825625        | 0.350862 | 0.364583        | 0.546875        |
| Turcibacterales     | 0.001176  | 0.002352 | 0               | 0        | 0.498459        | 0.679717        |
| Pseudomonadales     | 0.001253  | 0.002505 | 0               | 0        | 0.498459        | 0.623074        |
| Bacteroidales       | 47.18191  | 18.20676 | 44.52112        | 13.15364 | 0.789917        | 0.846339        |
| <b>Family</b>       |           |          |                 |          |                 |                 |
| Verrucomicrobiaceae | 4.824576  | 6.52518  | 42.85236        | 13.3653  | <b>0.000524</b> | <b>0.014667</b> |
| Lachnospiraceae     | 20.41525  | 7.040255 | 4.445972        | 2.339978 | <b>0.001048</b> | <b>0.014667</b> |
| Porphyromonadaceae  | 2.152951  | 2.077367 | 9.31845         | 2.955981 | <b>0.001286</b> | <b>0.012</b>    |
| Anaeroplasmataceae  | 1.002815  | 0.710155 | 0.025408        | 0.021829 | <b>0.013286</b> | 0.093           |
| Prevotellaceae      | 3.040375  | 2.662938 | 0.067972        | 0.071616 | <b>0.041143</b> | 0.2304          |

|                     |          |          |          |          |          |          |
|---------------------|----------|----------|----------|----------|----------|----------|
| Erysipelotrichaceae | 0.002467 | 0.003022 | 0.018016 | 0.014712 | 0.054095 | 0.252444 |
| Bacteroidaceae      | 7.07656  | 2.68484  | 17.34949 | 9.632654 | 0.062143 | 0.248571 |
| S24-7               | 34.59883 | 15.50786 | 17.42222 | 7.092572 | 0.068762 | 0.240667 |
| Lactobacillaceae    | 0.527982 | 0.474544 | 0.108251 | 0.074237 | 0.112667 | 0.350519 |
| Enterobacteriaceae  | 0.050666 | 0.057088 | 0.214467 | 0.20332  | 0.155619 | 0.396121 |
| Bifidobacteriaceae  | 0.001253 | 0.002505 | 0.020935 | 0.030072 | 0.242286 | 0.565333 |
| Coriobacteriaceae   | 0.048903 | 0.032907 | 0.027537 | 0.017513 | 0.296524 | 0.593048 |
| Alcaligenaceae      | 0.620809 | 0.209882 | 0.825625 | 0.350862 | 0.364714 | 0.63825  |
| Ruminococcaceae     | 2.940501 | 2.407005 | 1.611508 | 1.507888 | 0.405095 | 0.667216 |
| Clostridiaceae      | 0.006072 | 0.005473 | 0.013298 | 0.016477 | 0.446429 | 0.694444 |
| Turicibacteraceae   | 0.001176 | 0.002352 | 0        | 0        | 0.498459 | 0.734571 |
| Pseudomonadaceae    | 0.001253 | 0.002505 | 0        | 0        | 0.498459 | 0.697843 |
| Rikenellaceae       | 0.290563 | 0.208413 | 0.353299 | 0.430385 | 0.778429 | 0.990727 |
| Dehalobacteriaceae  | 0.08778  | 0.085155 | 0.087963 | 0.083495 | 0.995571 | 1.212    |
| Enterococcaceae     | 0.001232 | 0.002465 | 0.00248  | 0.004959 | 1        | 1.166667 |

Microbial comparisons performed using White's nonparametric t-test with false-discovery rate correction using the Benjamini-Hochberg method

Stool Day -3

Stool Day 0

Cecum Day 0

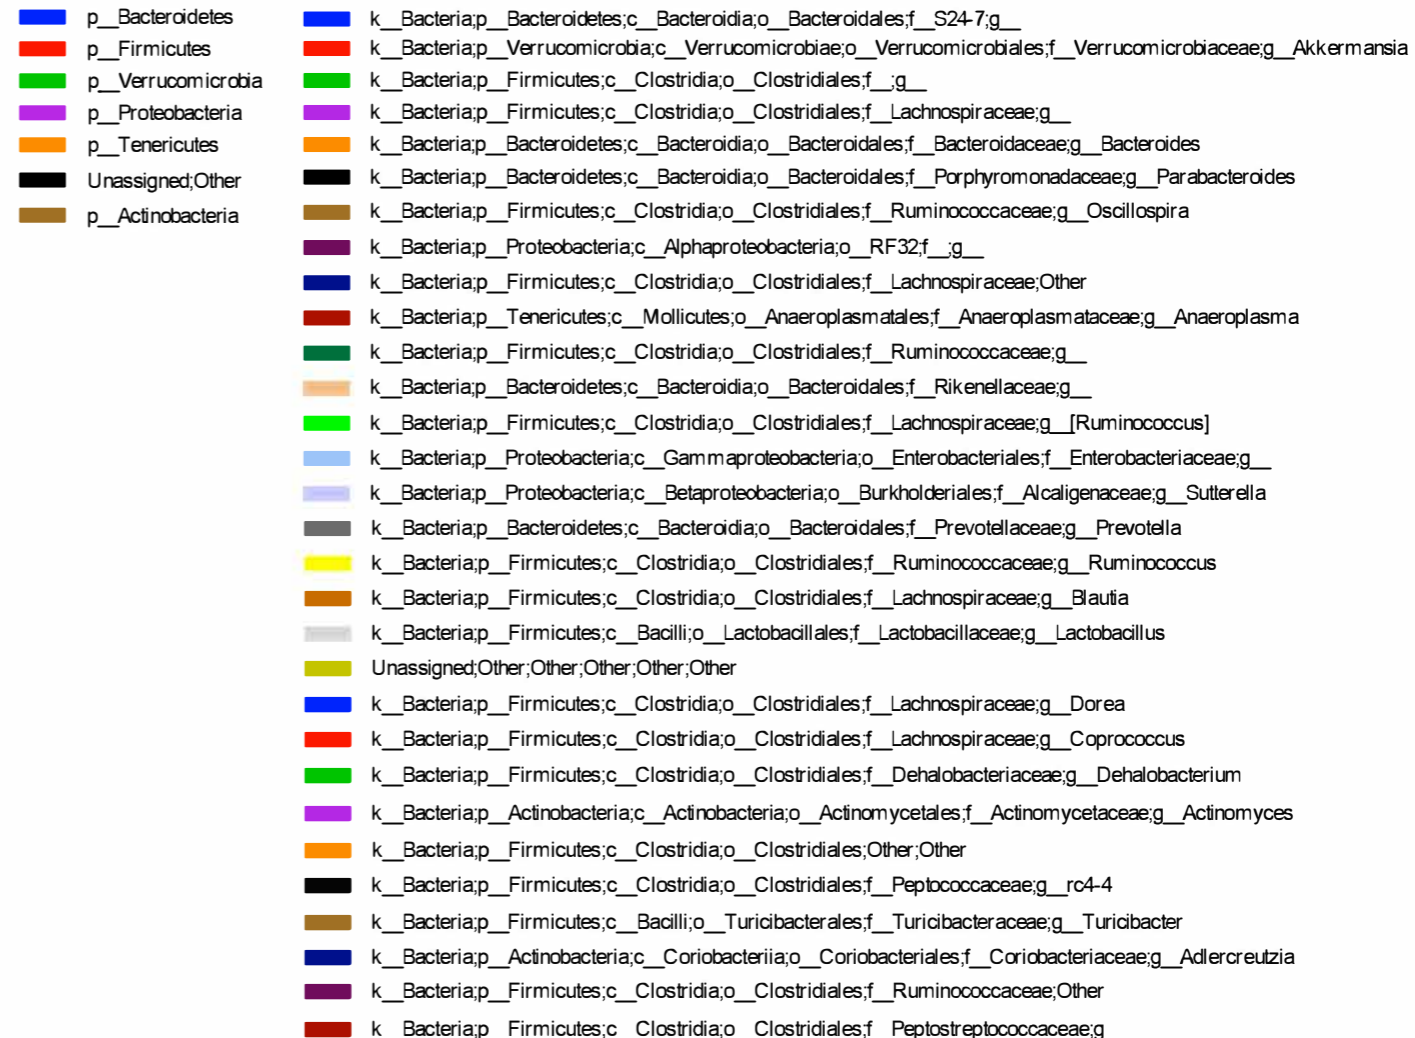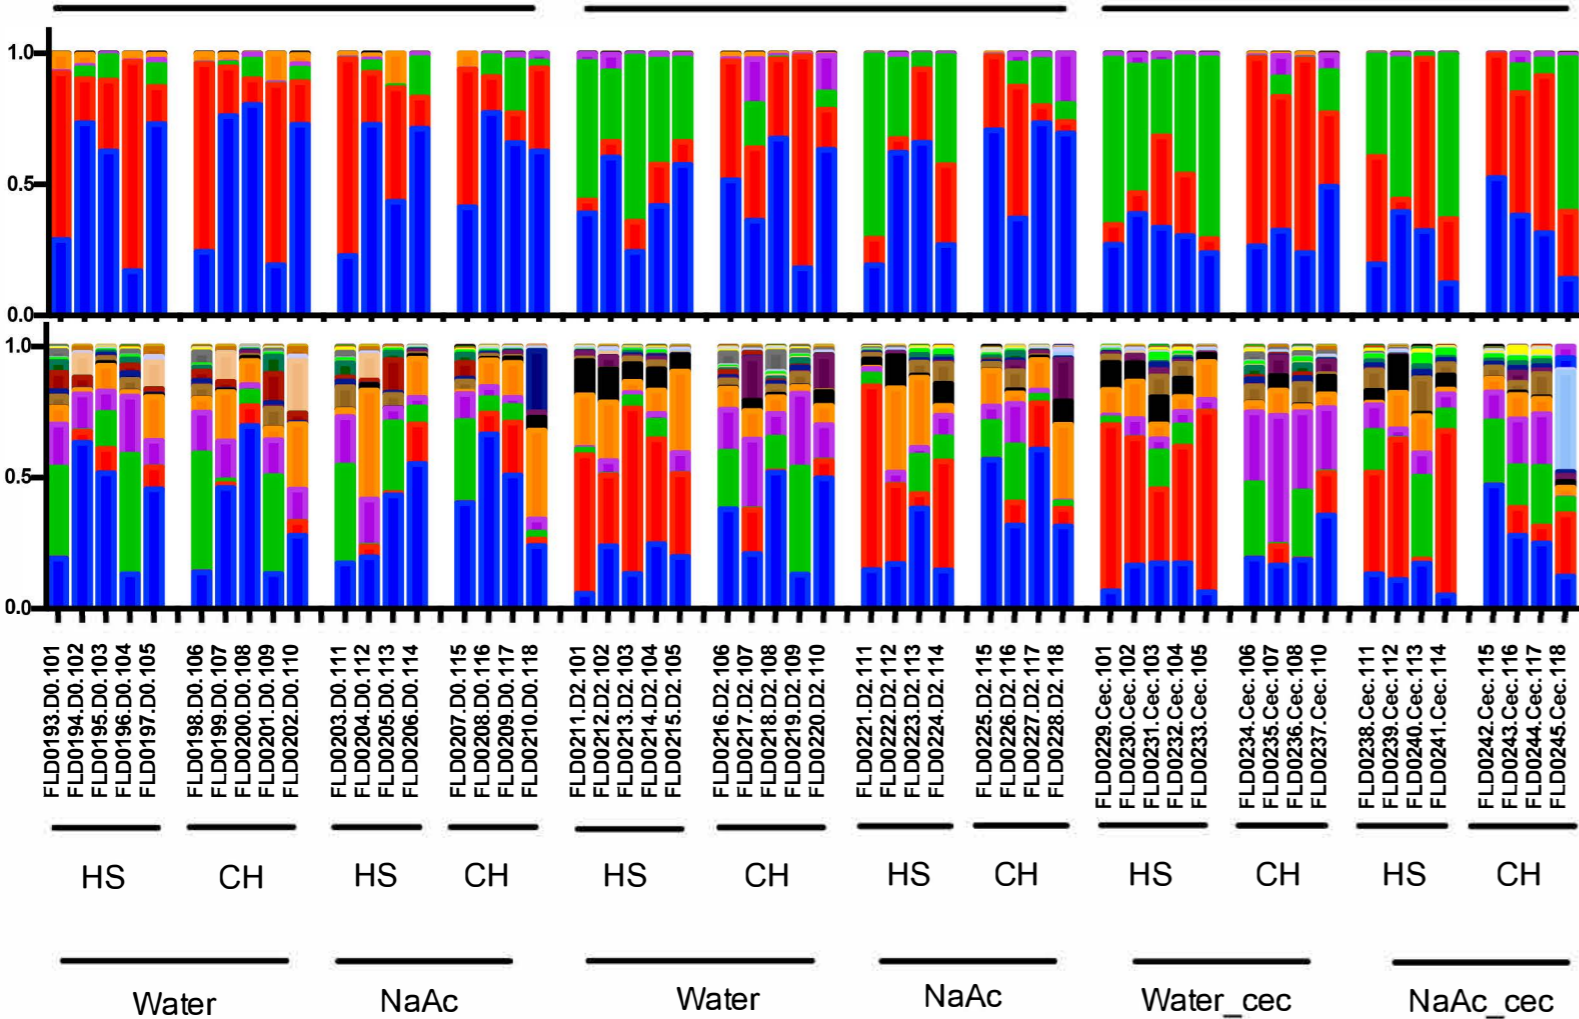

Supplement: 41598_2019_48749_MOESM1_ESM.pdf [file 41598_2019_48749_MOESM1_ESM.pdf]
